# Supplementary material
Source: PubMed Central journal article supplement (PMC3225338)

# Supplemental Figure 1

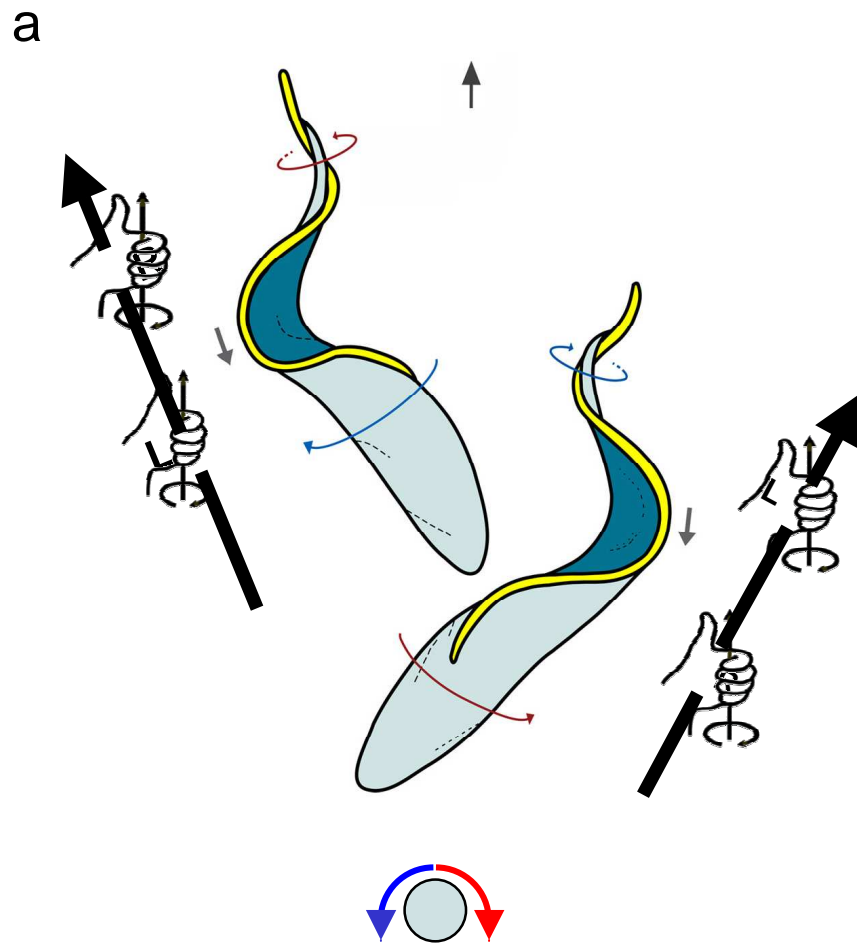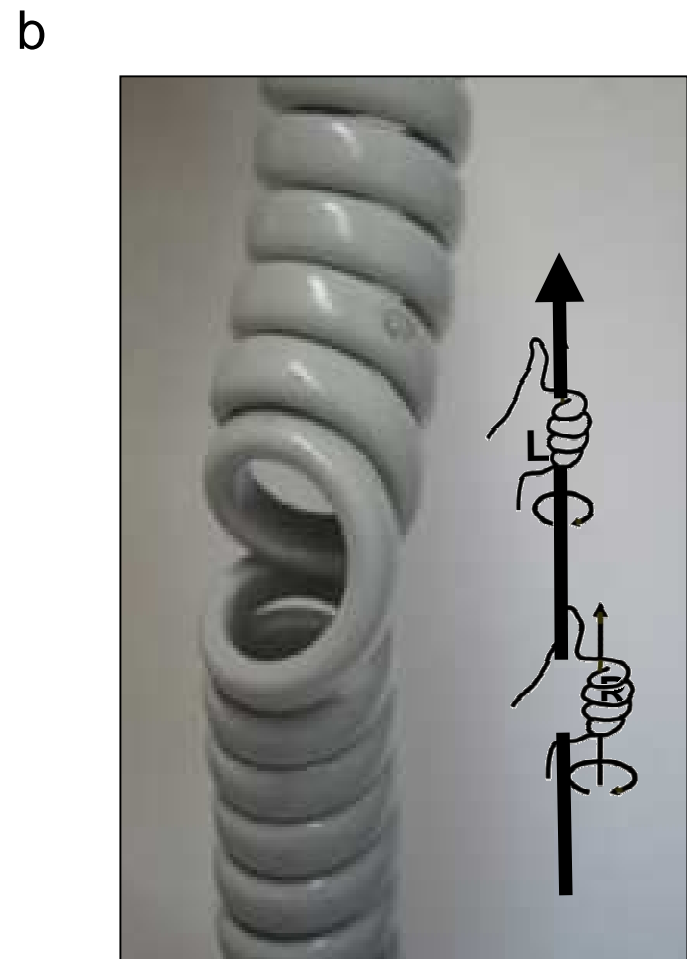

Supplement: NIHMS230439-supplement-02.pdf [file NIHMS230439-supplement-02.pdf]
